# Supplementary material for: Tidal variability in the Hong Kong region
Source: Copernicus journal article supplement (doi:10.5194/os-2018-62), 2018-06-11
Supplement: Supplementary file 1 [file os-2018-62-supplement.pdf]

# Tidal variability in the Hong Kong region

Adam T. Devlin\*

*Institute of Space and Earth Information Science, The Chinese University of Hong Kong, Shatin,  
Hong Kong SAR, China*

Jiayi Pan

*Institute of Space and Earth Information Science, The Chinese University of Hong Kong, Shatin,  
Hong Kong SAR, China*

*College of Marine Science, Nanjing University of Information Science and Technology, Nanjing,  
Jiangsu, China*

*Shenzhen Research Institute, The Chinese University of Hong Kong, Shenzhen, Guangdong, China*

Hui Lin

*Institute of Space and Earth Information Science, The Chinese University of Hong Kong, Shatin,  
Hong Kong SAR, China*

\* - Corresponding author

SUPPLEMENTARY MATERIAL

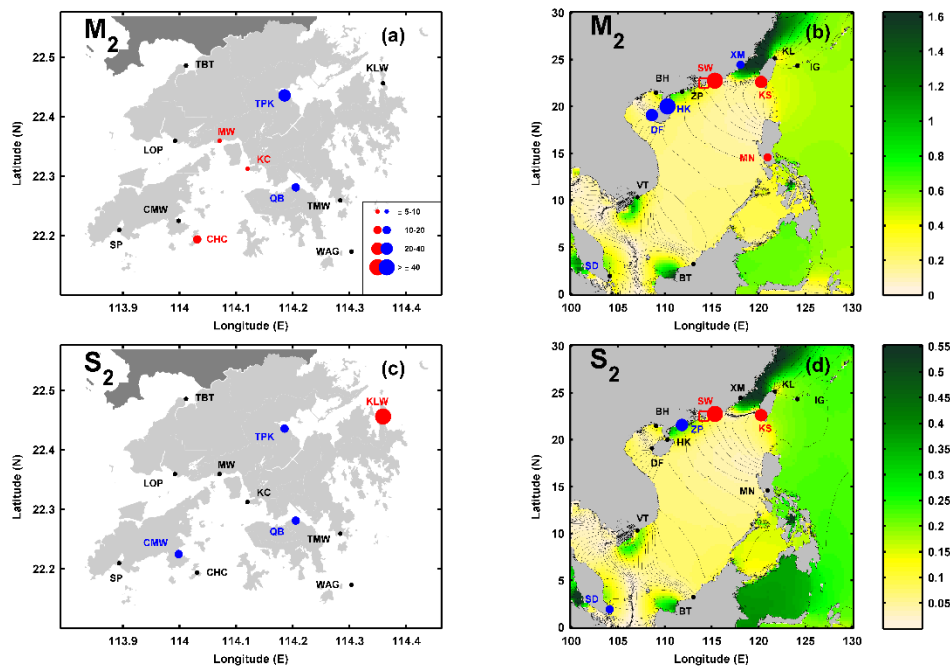

**Figure S1** Semidiurnal tidal anomaly correlations (TACs) of detrended  $M_2$  phase to detrended MSL in (a) Hong Kong, (b) the South China Sea, and of detrended  $S_2$  phase to detrended MSL in (c) Hong Kong, and (d) the South China Sea. Red markers indicate positive TACs and blue indicates negative TACs, with the marker size showing the relative magnitude according to the legend. Black marks indicate insignificant TACs. Map backgrounds in (b) and (d) show mean tidal amplitudes over the period of 1993-2014 (color scale, meters) and phases (solid lines,  $30^\circ$  increment), taken from the ocean tidal model of TPXO7.2, (Egbert and Erofeeva, 2002, 2010).

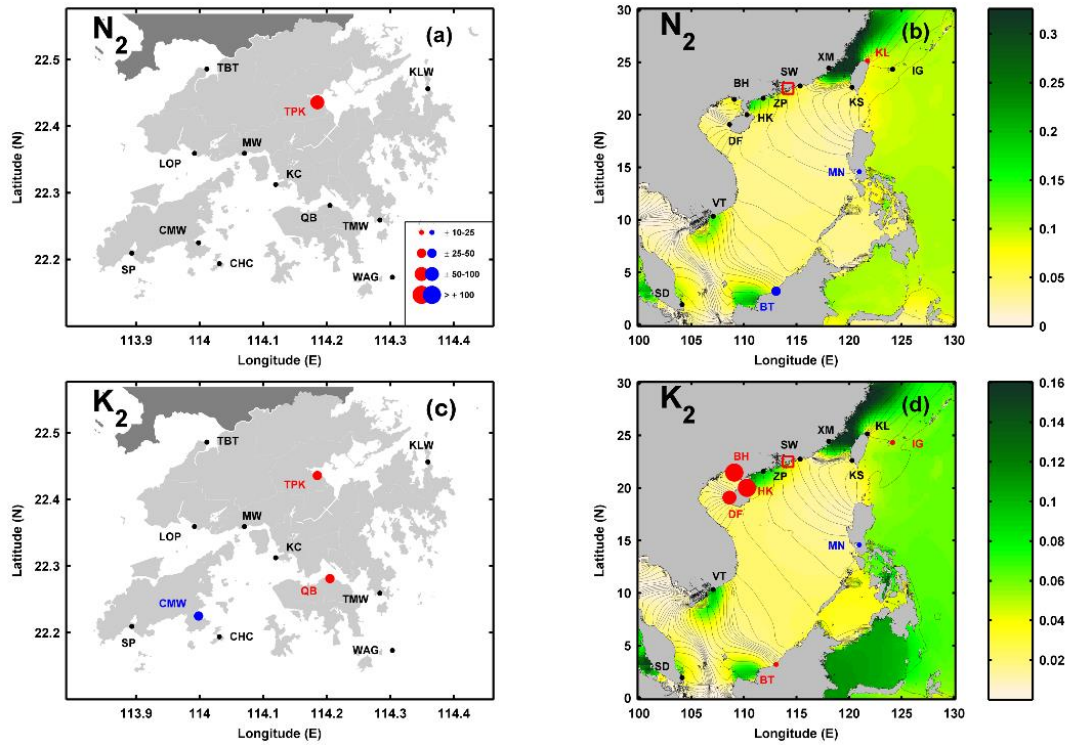

**Figure S2** Semidiurnal tidal anomaly correlations (TACs) of detrended  $N_2$  amplitude to detrended MSL in (a) Hong Kong, (b) the South China Sea, and of detrended  $K_2$  amplitude to detrended MSL in (c) Hong Kong, and (d) the South China Sea. Red markers indicate positive TACs and blue indicates negative TACs, with the marker size showing the relative magnitude according to the legend. Black marks indicate insignificant TACs. Map backgrounds in (b) and (d) show mean tidal amplitudes over the period of 1993-2014 (color scale, meters) and phases (solid lines,  $30^\circ$  increment), taken from the ocean tidal model of TPXO7.2, (Egbert and Erofeeva, 2002, 2010).

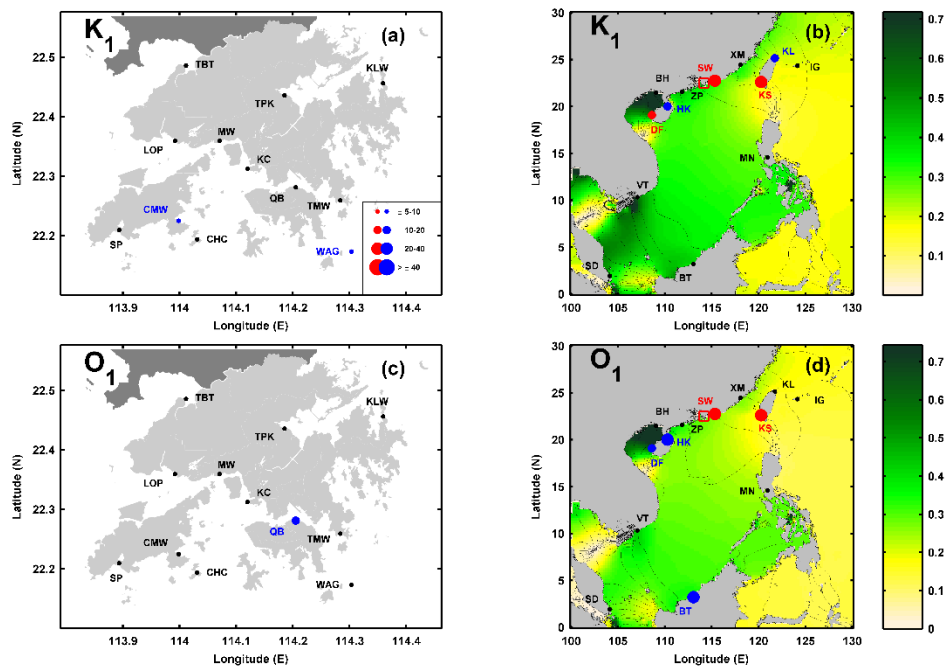

**Figure S3** Diurnal tidal anomaly correlations (TACs) of detrended  $K_1$  phase to detrended MSL in (a) Hong Kong, (b) the South China Sea, and of detrended  $O_1$  phase to detrended MSL in (c) Hong Kong, and (d) the South China Sea. Red markers indicate positive TACs and blue indicates negative TACs, with the marker size showing the relative magnitude according to the legend. Black marks indicate insignificant TACs. Map backgrounds in (b) and (d) show mean tidal amplitudes over the period of 1993-2014 (color scale, meters) and phases (solid lines,  $30^\circ$  increment), taken from the ocean tidal model of TPXO7.2, (Egbert and Erofeeva, 2002, 2010).

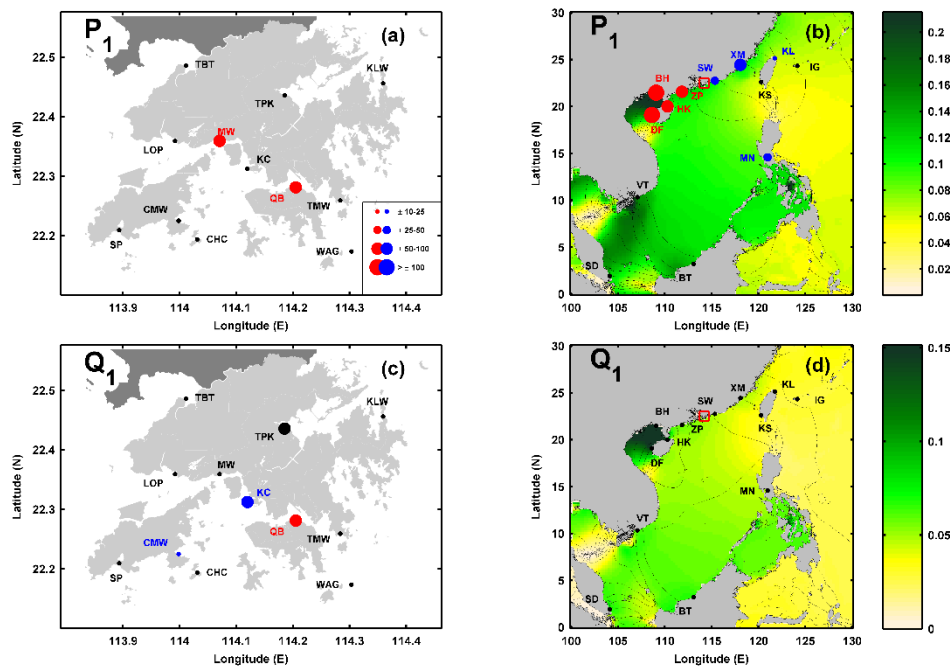

**Figure S4** Diurnal tidal anomaly correlations (TACs) of detrended  $P_1$  amplitude to detrended MSL in (a) Hong Kong, (b) the South China Sea, and of detrended  $Q_1$  amplitude to detrended MSL in (c) Hong Kong, and (d) the South China Sea. Red markers indicate positive TACs and blue indicates negative TACs, with the marker size showing the relative magnitude according to the legend. Black marks indicate insignificant TACs. Map backgrounds in (b) and (d) show mean tidal amplitudes over the period of 1993-2014 (color scale, meters) and phases (solid lines,  $30^\circ$  increment), taken from the ocean tidal model of TPXO7.2, (Egbert and Erofeeva, 2002, 2010).

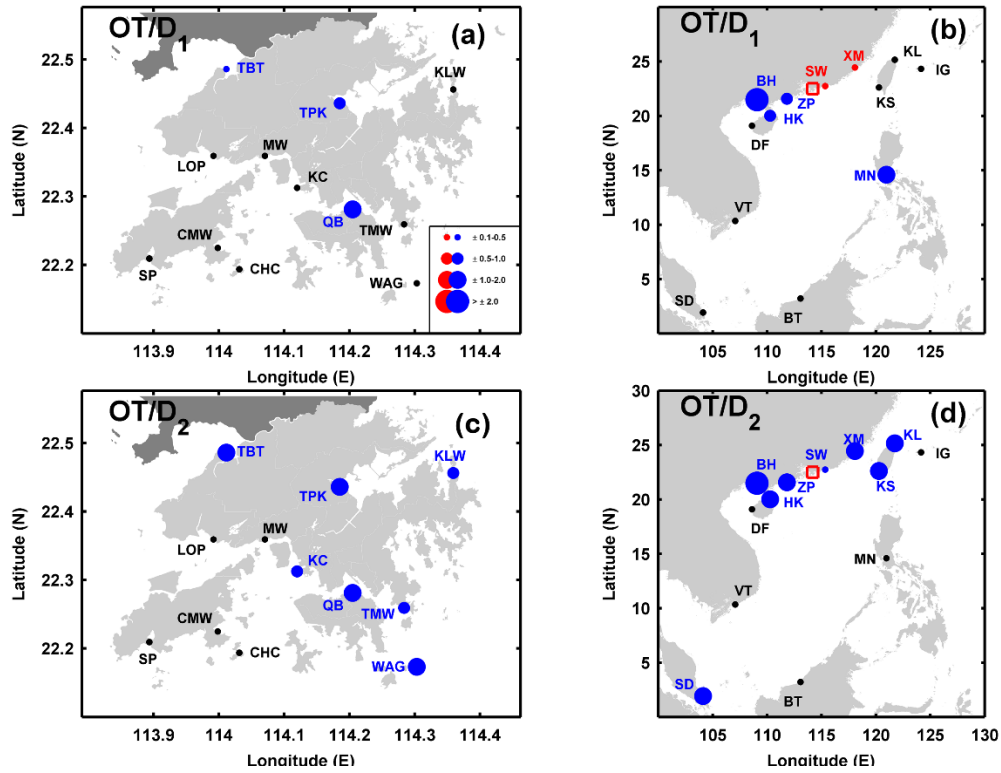

**Figure S5** Results of the OT TACs for detrended D<sub>1</sub> to detrended in Hong Kong (a) and the SCS (b), and detrended D<sub>2</sub> to detrended OT in Hong Kong (c) and the SCS (d). Red markers indicate positive TACs, blue indicates negative TACs, with the marker size showing the relative magnitude according to the legend. Black marks indicate insignificant TACs.

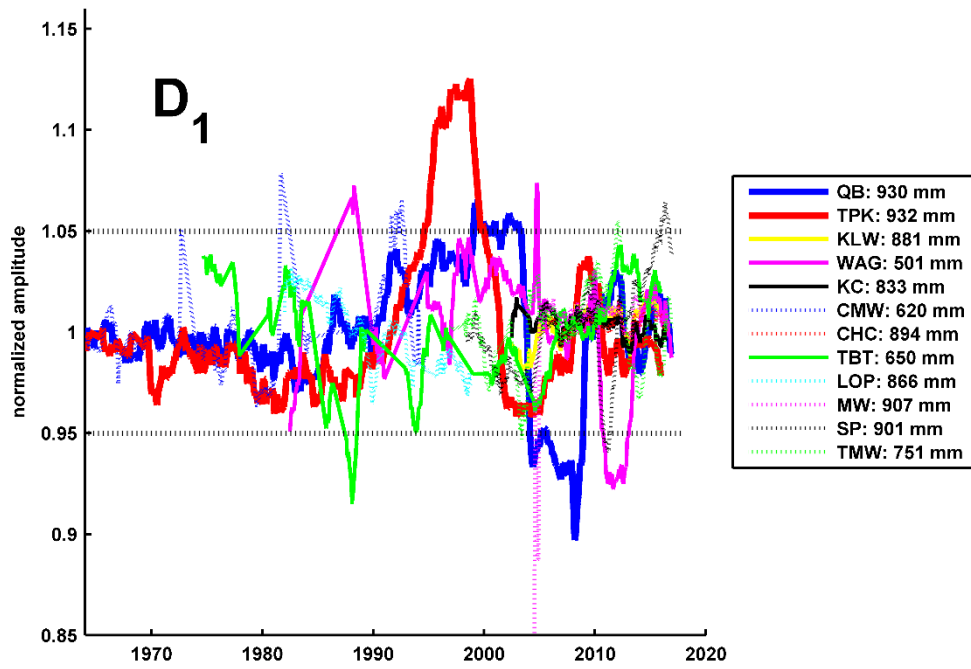

**Figure S6** Time-series of detrended  $D_1$  at all tide gauges in Hong Kong, plotted as a normalized amplitude to show relative variability, with mean values given in the legend. Each gauge is indicated by color according to the legend, with the QB (solid blue) and TPK (solid red) gauges shown as heavier lines. Horizontal dotted lines indicate the  $\pm 5\%$  variational band relative to the mean amplitude.

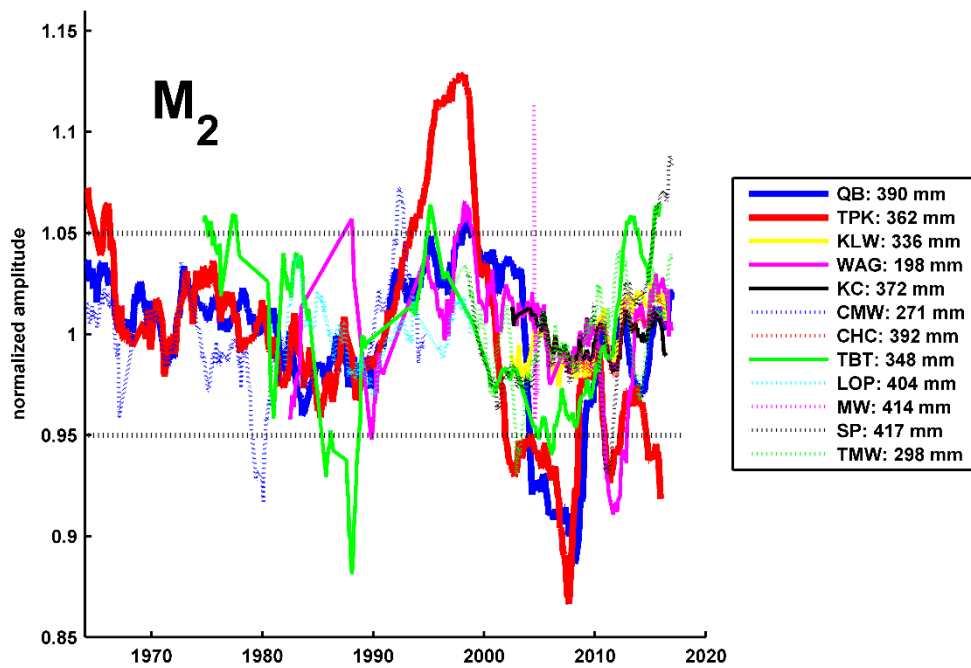

**Figure S7** Time-series of detrended  $M_2$  at all tide gauges in Hong Kong, plotted as a normalized amplitude to show relative variability, with mean values given in the legend. Each gauge is indicated by color according to the legend, with the QB (solid blue) and TPK (solid red) gauges shown as heavier lines. Horizontal dotted lines indicate the  $\pm 5\%$  variational band relative to the mean amplitude.



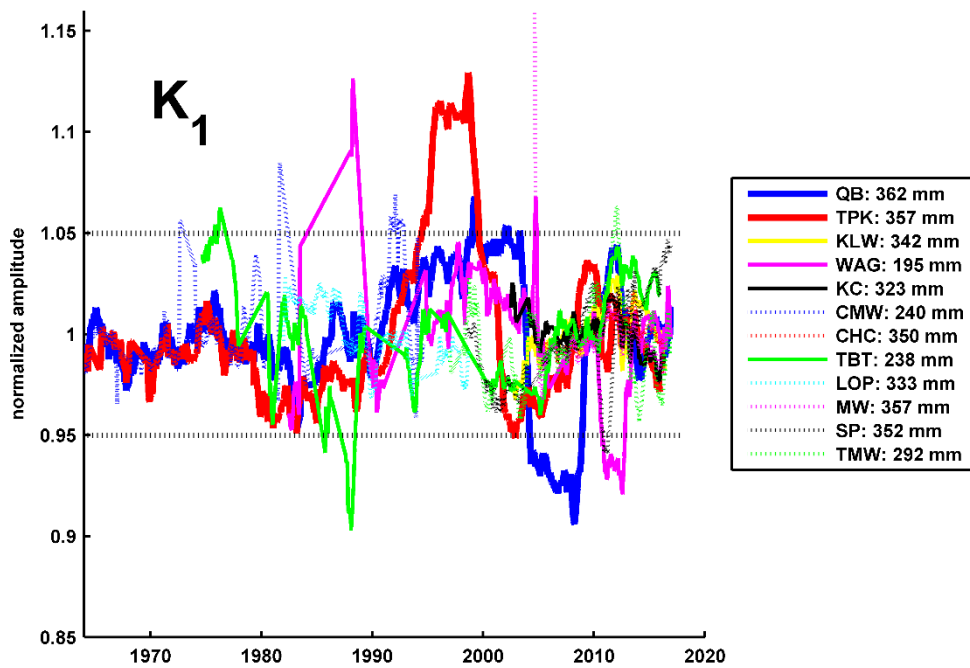

**Figure S8** Time-series of detrended  $K_1$  at all tide gauges in Hong Kong, plotted as a normalized amplitude to show relative variability, with mean values given in the legend. Each gauge is indicated by color according to the legend, with the QB (solid blue) and TPK (solid red) gauges shown as heavier lines. Horizontal dotted lines indicate the  $\pm 5\%$  variational band relative to the mean amplitude.

**Table S1** Phase TACs for M<sub>2</sub>, S<sub>2</sub>, K<sub>1</sub>, and O<sub>1</sub>. All values given are in units of degree change in the tidal phase for a 1-meter fluctuation in sea-level (deg m<sup>-1</sup>). Statistically significant positive values are given in bold italic text.

| <i>Station</i>             | <b>M<sub>2</sub> TAC</b> | <b>S<sub>2</sub> TAC</b> | <b>K<sub>1</sub> TAC</b> | <b>O<sub>1</sub> TAC</b> |
|----------------------------|--------------------------|--------------------------|--------------------------|--------------------------|
| <i>Quarry Bay (QB)</i>     | <b>-15 ± 2</b>           | <b>-17 ± 5</b>           | -4 ± 2                   | <b>-11 ± 1</b>           |
| <i>Tai Po Kau (TPK)</i>    | <b>-28 ± 6</b>           | <b>-18 ± 3</b>           | -6 ± 4                   | -13 ± 4                  |
| <i>Tsim Bei Tusi (TBT)</i> | +19 ± 13                 | +19 ± 17                 | +6 ± 5                   | +5 ± 4                   |
| <i>Chi Ma Wan (CMW)</i>    | -5 ± 5                   | <b>-16 ± 2</b>           | <b>-7 ± 4</b>            | -3 ± 1                   |
| <i>Cheung Chau (CHC)</i>   | <b>+13 ± 2</b>           | +23 ± 15                 | +39 ± 36                 | +1 ± 13                  |
| <i>Lok On Pai (LOP)</i>    | -2 ± 4                   | -15 ± 9                  | +1 ± 6                   | +3 ± 6                   |
| <i>Ma Wan (MW)</i>         | <b>+9 ± 2</b>            | +9 ± 8                   | +2 ± 13                  | -4 ± 5                   |
| <i>Tai Miu Wan (TMW)</i>   | +4 ± 8                   | +2 ± 9                   | +1 ± 7                   | +2 ± 3                   |
| <i>Shek Pik (SP)</i>       | -11 ± 6                  | -10 ± 12                 | -6 ± 6                   | +12 ± 2                  |
| <i>Waglan Island (WAG)</i> | -40 ± 30                 | +12 ± 2                  | <b>+6 ± 1</b>            | +4 ± 3                   |
| <i>Ko Lau Wan (KLW)</i>    | +7 ± 3                   | <b>+43 ± 22</b>          | +10 ± 15                 | -3 ± 5                   |
| <i>Kwai Chung (KC)</i>     | <b>+8 ± 2</b>            | +45 ± 20                 | +29 ± 52                 | -9 ± 23                  |
| <i>Dongfang (DF)</i>       | <b>-23 ± 6</b>           | -15 ± 13                 | <b>+16 ± 3</b>           | <b>-12 ± 2</b>           |
| <i>Beihei (BH)</i>         | +10 ± 6                  | +25 ± 23                 | +1 ± 5                   | -10 ± 3                  |
| <i>Haikou (HK)</i>         | <b>-67 ± 21</b>          | -6 ± 7                   | <b>-13 ± 2</b>           | <b>-20 ± 3</b>           |
| <i>Zhapo (ZP)</i>          | -5 ± 4                   | <b>-22 ± 2</b>           | +6 ± 7                   | -2 ± 7                   |
| <i>Shanwei (SW)</i>        | <b>+58 ± 11</b>          | <b>+86 ± 26</b>          | <b>+31 ± 11</b>          | <b>+28 ± 1</b>           |
| <i>Xiamen (XM)</i>         | <b>-12 ± 2</b>           | -7 ± 1                   | -2 ± 3                   | -1 ± 3                   |
| <i>Keelung (KL)</i>        | +8 ± 7                   | -3 ± 19                  | <b>-10 ± 2</b>           | -3 ± 3                   |
| <i>Kaohsiung (KS)</i>      | <b>+34 ± 9</b>           | <b>+39 ± 14</b>          | <b>+22 ± 4</b>           | <b>+22 ± 6</b>           |
| <i>Manila, PHL (MN)</i>    | <b>+13 ± 3</b>           | +1 ± 5                   | +2 ± 5                   | -6 ± 5                   |
| <i>Vung Tau, VTM (VT)</i>  | -27 ± 22                 | -3 ± 18                  | -2 ± 3                   | -34 ± 22                 |
| <i>Sedili, MLY (SD)</i>    | -8 ± 1                   | <b>-14 ± 4</b>           | -9 ± 4                   | +8 ± 3                   |
| <i>Bintulu, MLY (BT)</i>   | -3 ± 5                   | -7 ± 11                  | +8 ± 5                   | <b>-27 ± 4</b>           |
| <i>Ishigaki, JPN (IG)</i>  | -2 ± 4                   | -8 ± 9                   | -2 ± 3                   | -3 ± 3                   |

**Table S2** Amplitude TACs for N<sub>2</sub>, K<sub>2</sub>, P<sub>1</sub>, and Q<sub>1</sub>. All values given are in units of millimeter change in the tidal amplitude for a 1-meter fluctuation in sea-level (mm m<sup>-1</sup>). Statistically significant positive values are given in bold italic text.

| <i>Station</i>             | <b>N<sub>2</sub> TAC</b> | <b>K<sub>2</sub> TAC</b> | <b>P<sub>1</sub> TAC</b> | <b>Q<sub>1</sub> TAC</b> |
|----------------------------|--------------------------|--------------------------|--------------------------|--------------------------|
| <i>Quarry Bay (QB)</i>     | +33 ± 10                 | <b>+35 ± 14</b>          | <b>+71 ± 10</b>          | <b>+50 ± 11</b>          |
| <i>Tai Po Kau (TPK)</i>    | <b>+85 ± 12</b>          | <b>+35 ± 14</b>          | +19 ± 16                 | +18 ± 6                  |
| <i>Tsim Bei Tusi (TBT)</i> | +23 ± 21                 | -2 ± 14                  | -9 ± 6                   | -8 ± 12                  |
| <i>Chi Ma Wan (CMW)</i>    | -7 ± 5                   | <b>-25 ± 6</b>           | -4 ± 6                   | <b>-18 ± 4</b>           |
| <i>Cheung Chau (CHC)</i>   | -22 ± 35                 | -12 ± 44                 | -26 ± 32                 | -33 ± 30                 |
| <i>Lok On Pai (LOP)</i>    | -13 ± 24                 | -5 ± 18                  | +9 ± 12                  | -3 ± 21                  |
| <i>Ma Wan (MW)</i>         | +22 ± 17                 | +3 ± 18                  | <b>+65 ± 9</b>           | -15 ± 32                 |
| <i>Tai Miu Wan (TMW)</i>   | +4 ± 13                  | +12 ± 8                  | +8 ± 4                   | -14 ± 12                 |
| <i>Shek Pik (SP)</i>       | +4 ± 11                  | +17 ± 10                 | +12 ± 20                 | +18 ± 17                 |
| <i>Waglan Island (WAG)</i> | +5 ± 5                   | -6 ± 3                   | +2 ± 6                   | -2 ± 6                   |
| <i>Ko Lau Wan (KLW)</i>    | +29 ± 29                 | +8 ± 14                  | -7 ± 26                  | -26 ± 14                 |
| <i>Kwai Chung (KC)</i>     | -10 ± 29                 | -16 ± 36                 | -33 ± 50                 | <b>-60 ± 14</b>          |
| <i>Dongfang (DF)</i>       | -16 ± 22                 | <b>+67 ± 19</b>          | <b>+120 ± 42</b>         | +31 ± 28                 |
| <i>Beihei (BH)</i>         | -15 ± 50                 | <b>+175 ± 56</b>         | <b>+153 ± 33</b>         | +111 ± 51                |
| <i>Haikou (HK)</i>         | +10 ± 25                 | <b>+152 ± 76</b>         | <b>+70 ± 33</b>          | -40 ± 37                 |
| <i>Zhapo (ZP)</i>          | -12 ± 35                 | -3 ± 40                  | <b>+50 ± 15</b>          | -2 ± 34                  |
| <i>Shanwei (SW)</i>        | -46 ± 16                 | -1 ± 12                  | <b>-47 ± 10</b>          | -13 ± 13                 |
| <i>Xiamen (XM)</i>         | -15 ± 21                 | -22 ± 22                 | <b>-55 ± 20</b>          | -13 ± 5                  |
| <i>Keelung (KL)</i>        | <b>+17 ± 9</b>           | -18 ± 4                  | <b>-19 ± 7</b>           | +12 ± 11                 |
| <i>Kaohsiung (KS)</i>      | +9 ± 14                  | -2 ± 12                  | -16 ± 10                 | +5 ± 13                  |
| <i>Manila, PHL (MN)</i>    | <b>-22 ± 7</b>           | <b>-23 ± 6</b>           | <b>-33 ± 13</b>          | -7 ± 10                  |
| <i>Vung Tau, VTM (VT)</i>  | +44 ± 9                  | +3 ± 23                  | +3 ± 18                  | -38 ± 13                 |
| <i>Sedili, MLY (SD)</i>    | -7 ± 18                  | -15 ± 7                  | -4 ± 13                  | +201 ± 76                |
| <i>Bintulu, MLY (BT)</i>   | <b>-31 ± 3</b>           | <b>+18 ± 2</b>           | +1 ± 22                  | +370 ± 64                |
| <i>Ishigaki, JPN (IG)</i>  | +13 ± 17                 | <b>+16 ± 4</b>           | -9 ± 8                   | +10 ± 10                 |

**Table S3** The D<sub>1</sub> and D<sub>2</sub> OT TACs, given in unitless ratios (i.e., mm mm<sup>-1</sup>). Statistically significant positive values are given in bold italic text.

| <i>Station</i>             | <b>OT/D<sub>1</sub></b> | <b>OT/D<sub>2</sub></b> |
|----------------------------|-------------------------|-------------------------|
| <i>Quarry Bay (QB)</i>     | <b>-1.88 ± 0.43</b>     | <b>-1.76 ± 0.61</b>     |
| <i>Tai Po Kau (TPK)</i>    | <b>-0.88 ± 0.07</b>     | <b>-1.00 ± 0.05</b>     |
| <i>Tsim Bei Tusi (TBT)</i> | <b>-0.47 ± 0.11</b>     | <b>-1.12 ± 0.09</b>     |
| <i>Chi Ma Wan (CMW)</i>    | -0.17 ± 0.47            | -0.13 ± 0.29            |
| <i>Cheung Chau (CHC)</i>   | -0.25 ± 0.76            | -0.17 ± 0.66            |
| <i>Lok On Pai (LOP)</i>    | -0.11 ± 0.27            | -0.42 ± 0.47            |
| <i>Ma Wan (MW)</i>         | -0.28 ± 0.60            | -0.07 ± 0.86            |
| <i>Kwai Chung (KC)</i>     | -0.21 ± 0.63            | <b>-0.74 ± 0.16</b>     |
| <i>Ko Lau Wan (KLW)</i>    | -0.07 ± 0.38            | <b>-0.49 ± 0.29</b>     |
| <i>Tai Miu Wan (TMW)</i>   | -0.59 ± 0.40            | <b>-0.50 ± 0.07</b>     |
| <i>Waglan Island (WAG)</i> | -0.71 ± 0.66            | <b>-1.73 ± 0.11</b>     |
| <i>Shek Pik (SP)</i>       | -0.36 ± 0.41            | -0.42 ± 0.72            |
| <i>Dongfang (DF)</i>       | -5.06 ± 2.39            | +1.02 ± 1.21            |
| <i>Beihei (BH)</i>         | <b>-2.88 ± 0.10</b>     | <b>-2.33 ± 0.05</b>     |
| <i>Haikou (HK)</i>         | <b>-0.67 ± 0.03</b>     | <b>-1.10 ± 0.04</b>     |
| <i>Zhapo (ZP)</i>          | <b>-0.59 ± 0.04</b>     | <b>-1.39 ± 0.63</b>     |
| <i>Shanwei (SW)</i>        | <b>+0.22 ± 0.07</b>     | <b>-0.23 ± 0.06</b>     |
| <i>Xiamen (XM)</i>         | <b>+0.27 ± 0.03</b>     | <b>-1.21 ± 0.21</b>     |
| <i>Keelung (KL)</i>        | +0.36 ± 0.62            | <b>-1.42 ± 0.31</b>     |
| <i>Kaohsiung (KS)</i>      | -0.31 ± 0.42            | <b>-1.07 ± 0.37</b>     |
| <i>Manila, PHL (MN)</i>    | <b>-1.92 ± 0.70</b>     | -0.04 ± 0.47            |
| <i>Vung Tau, VTM (VT)</i>  | -0.07 ± 0.29            | +0.50 ± 0.33            |
| <i>Sedili, MLY (SD)</i>    | -0.39 ± 1.03            | <b>-1.71 ± 0.03</b>     |
| <i>Bintulu, MLY (BT)</i>   | +1.72 ± 0.65            | -0.15 ± 0.26            |
| <i>Ishigaki, JPN (IG)</i>  | -0.44 ± 0.32            | +0.60 ± 0.48            |

**Table S4** Correlations of water level components with the North Point/Quarry Bay (QB) tide gauge, showing S<sub>2</sub>, O<sub>1</sub>, K<sub>2</sub>, P<sub>1</sub>, Q<sub>1</sub>, and MSL. Two numbers are given in each column, representing the correlations in the “historical” era (pre-1997), and the “modern” era (post-1997). Non-existent data is indicated by “~”. An average value is also calculated at the local (Hong Kong) and regional (South China Sea) scale for each era. Data records that cover both time periods will indicate the better correlated era by bold text.

| <i>Station</i>         | <b>S<sub>2</sub></b> | <b>O<sub>1</sub></b> | <b>K<sub>2</sub></b> | <b>P<sub>1</sub></b> | <b>Q<sub>1</sub></b> | <b>MSL</b>         |
|------------------------|----------------------|----------------------|----------------------|----------------------|----------------------|--------------------|
| <i>TPK</i>             | <b>0.65/0.39</b>     | <b>0.69/0.16</b>     | <b>0.37/0.34</b>     | <b>0.33/0.18</b>     | 0.63/0.60            | 0.50/ <b>0.53</b>  |
| <i>TBT</i>             | 0.34/ <b>0.35</b>    | <b>0.30/0.07</b>     | 0.19/ <b>0.78</b>    | 0.10/ <b>0.35</b>    | <b>0.66/0.66</b>     | -0.12/ <b>0.37</b> |
| <i>CMW/CHC</i>         | <b>0.44/0.10</b>     | <b>0.67/-0.09</b>    | 0.39/ <b>0.50</b>    | 0.22/ <b>0.47</b>    | <b>0.68/0.44</b>     | <b>0.53/0.50</b>   |
| <i>LOP/MW</i>          | <b>0.36/0.09</b>     | <b>0.54/0.06</b>     | <b>0.71/0.54</b>     | <b>0.69/0.41</b>     | <b>0.75/0.38</b>     | <b>0.64/0.15</b>   |
| <i>TMW</i>             | ~/0.45               | ~/0.18               | ~/0.26               | ~/0.09               | ~/0.31               | ~/0.73             |
| <i>SP</i>              | ~/0.19               | ~/0.16               | ~/0.50               | ~/0.07               | ~/0.63               | ~/0.66             |
| <i>WAG</i>             | ~/0.14               | ~/0.12               | ~/0.10               | ~/0.06               | ~/0.60               | ~/0.76             |
| <i>KC</i>              | ~/0.03               | ~/0.01               | ~/0.45               | ~/0.13               | ~/0.60               | ~/0.27             |
| <i>KLW</i>             | ~/0.09               | ~/0.14               | ~/0.37               | ~/0.51               | ~/0.51               | ~/0.60             |
| <b><i>HK Ave.</i></b>  | <b>0.44/0.18</b>     | <b>0.50/0.06</b>     | 0.40/ <b>0.41</b>    | <b>0.33/0.23</b>     | <b>0.68/0.53</b>     | 0.39/ <b>0.51</b>  |
| <i>DF</i>              | 0.40/~               | 0.46/~               | 0.01/~               | 0.30/~               | 0.61/~               | 0.63/~             |
| <i>BH</i>              | 0.40/~               | 0.42/~               | 0.13/~               | 0.30/~               | 0.62/~               | 0.36/~             |
| <i>HK</i>              | 0.47/~               | 0.44/~               | 0.42/~               | 0.37/~               | 0.55/~               | 0.66/~             |
| <i>ZP</i>              | 0.10/~               | 0.50/~               | 0.45/~               | 0.52/~               | 0.72/~               | 0.70/~             |
| <i>SW</i>              | 0.32/~               | 0.19/~               | 0.56/~               | 0.28/~               | 0.59/~               | 0.65/~             |
| <i>XM</i>              | -0.41/~              | 0.39/~               | 0.03/~               | 0.25/~               | 0.49/~               | 0.57/~             |
| <i>KL</i>              | ~/0.08               | ~/0.18               | ~/0.24               | ~/0.27               | ~/0.15               | ~/0.36             |
| <i>KS</i>              | ~/0.14               | ~/0.32               | ~/0.11               | ~/0.40               | ~/0.15               | ~/0.40             |
| <i>MN</i>              | ~/0.14               | ~/0.44               | ~/0.17               | ~/0.08               | ~/0.26               | ~/0.21             |
| <i>VT</i>              | ~/0.18               | ~/0.07               | ~/0.25               | ~/0.48               | ~/0.41               | ~/0.51             |
| <i>SD</i>              | ~/0.49               | ~/0.48               | ~/0.32               | ~/0.39               | ~/0.51               | ~/0.53             |
| <i>BT</i>              | ~/0.28               | ~/0.60               | ~/0.41               | ~/0.26               | ~/0.61               | ~/0.79             |
| <i>IG</i>              | <b>-0.22/0.07</b>    | 0.11/ <b>0.32</b>    | <b>0.10/-0.01</b>    | <b>0.11/-0.20</b>    | <b>0.29/0.08</b>     | <b>0.50/0.01</b>   |
| <b><i>SCS Ave.</i></b> | <b>0.15/0.12</b>     | <b>0.36/0.03</b>     | <b>0.26/0.133</b>    | <b>0.30/0.11</b>     | <b>0.55/0.31</b>     | <b>0.58/0.40</b>   |
